# Supplementary material for: Human-Mediated Marine Dispersal Influences the Population Structure of Aedes aegypti in the Philippine Archipelago
Source: PubMed Central journal article supplement (PMC4454683; doi:10.1371/journal.pntd.0003829), 2015-06-03
Supplement: pntd.0003829.s001.pdf [file pntd.0003829.s001.pdf]

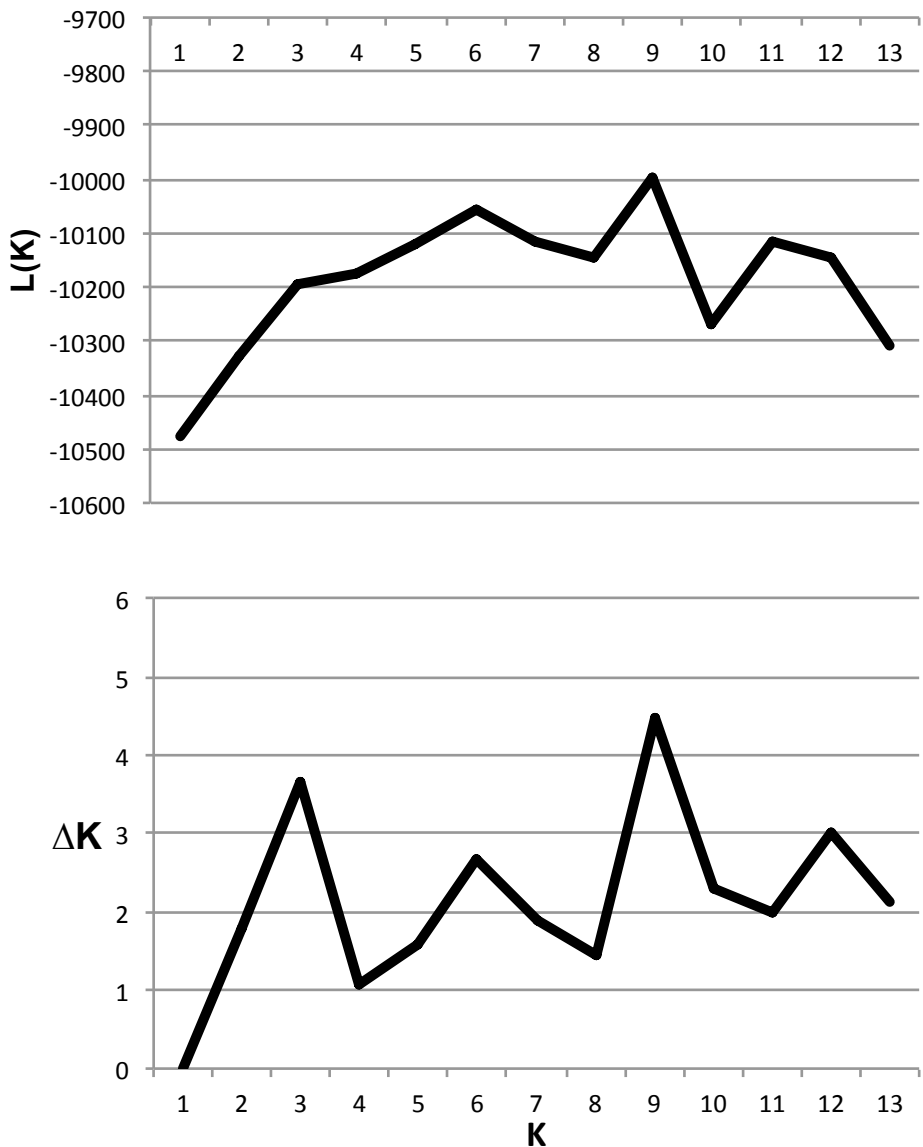

**Fig. S1.  $L(K)$  and  $\Delta K$  at different values of  $K$ .** Peaks of  $\Delta K$  were found at  $K=3, K=6, K=9$ . B.  $L(K)$  are averaged over 10 independent replicates.
