# Supplementary material for: Human-Mediated Marine Dispersal Influences the Population Structure of Aedes aegypti in the Philippine Archipelago
Source: PubMed Central journal article supplement (PMC4454683; doi:10.1371/journal.pntd.0003829), 2015-06-03
Supplement: pntd.0003829.s002.pdf [file pntd.0003829.s002.pdf]

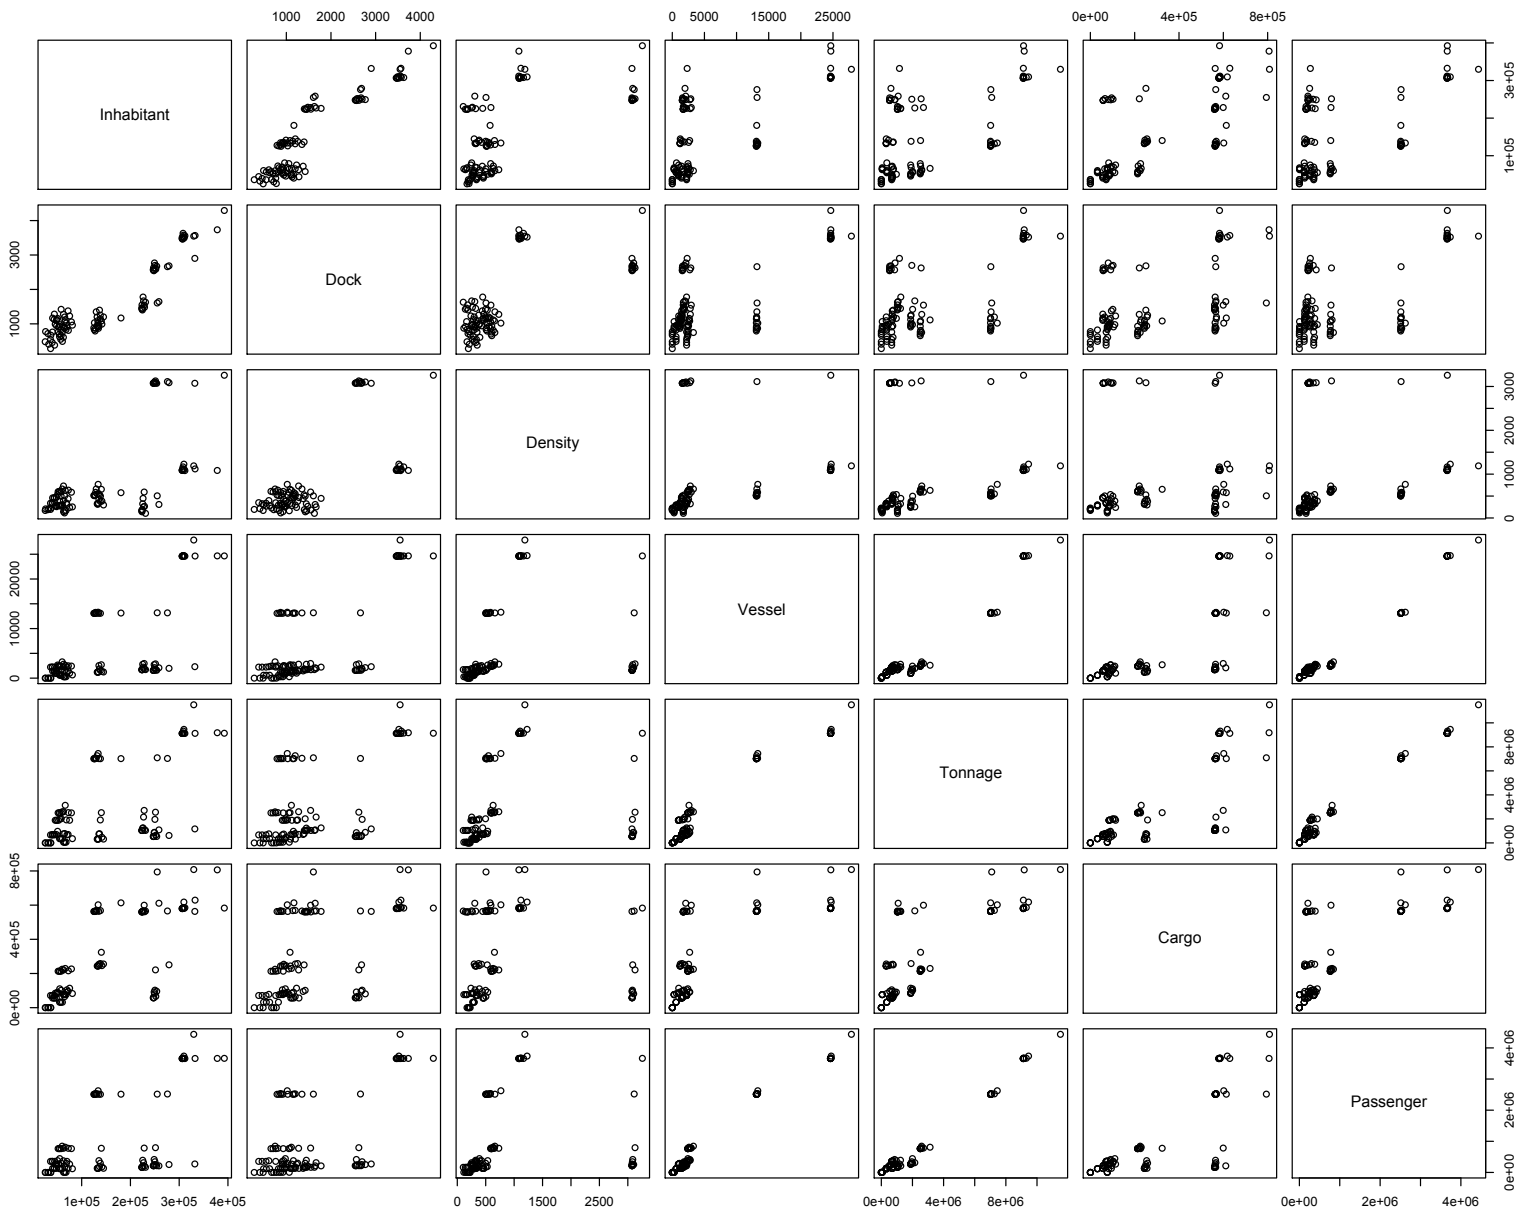

**S2 Fig. Scatter plot matrix of the predictors used in univariate and multivariate regressions.** Density is non-linearly correlated to predictors related to port size (i.e. Inhabitant and Dock), while Cargo is non-linearly correlated to predictors related to ship connectivity (i.e. Vessel, Tonnage and Passenger). Then, Density and Cargo are totally non-correlated between each other. For detailed description of the predictors refer to Table 2.
