# Supplementary material for: Human-Mediated Marine Dispersal Influences the Population Structure of Aedes aegypti in the Philippine Archipelago
Source: PubMed Central journal article supplement (PMC4454683; doi:10.1371/journal.pntd.0003829), 2015-06-03
Supplement: pntd.0003829.s008.pdf [file pntd.0003829.s008.pdf]

## Letter of Notice on the Examination Result by Ethical Committee

Date June 12, 2013



Kouichi Morita  
Dean  
Institute of Tropical Medicine  
Nagasaki University

Applicant: Yukiko Higa

Approval No. 130606105

Title of Investigation: Distribution of dengue vector infestation, pyrethroid-related insecticide resistance and population genetics of the vectors in the Philippines.

The protocol and execution plan for the above-entitled investigation has been reviewed and considered appropriate without any ethical problems by the Ethical Committee of Institute of Tropical Medicine, Nagasaki University held on June 6, 2013.

### Memorandum

|                            |                                                                                                                                                                                                                                                     |
|----------------------------|-----------------------------------------------------------------------------------------------------------------------------------------------------------------------------------------------------------------------------------------------------|
| Decision to the submission | <input type="checkbox"/> Approved<br><input type="checkbox"/> Conditionally Approved<br><input type="checkbox"/> Recommendation for Revision of Protocol<br><input type="checkbox"/> Rejected<br><input checked="" type="checkbox"/> Not Pertinence |
| Reason for the decision    | This study focuses on mosquito collection only and therefore has no ethical problem. Since sampling from human such as blood and personal information is not involved, the protocol and execution plan are of non-pertinence for the committee.     |
